# Supplementary material for: The Role of Pea (Pisum sativum) Seeds in Transmission of Entero-Aggregative Escherichia coli to Growing Plants
Source: PubMed Central journal article supplement (PMC7565074; doi:10.3390/microorganisms8091271), 2020-08-21
Supplement: microorganisms-08-01271-s001.pdf [file microorganisms-08-01271-s001.pdf]

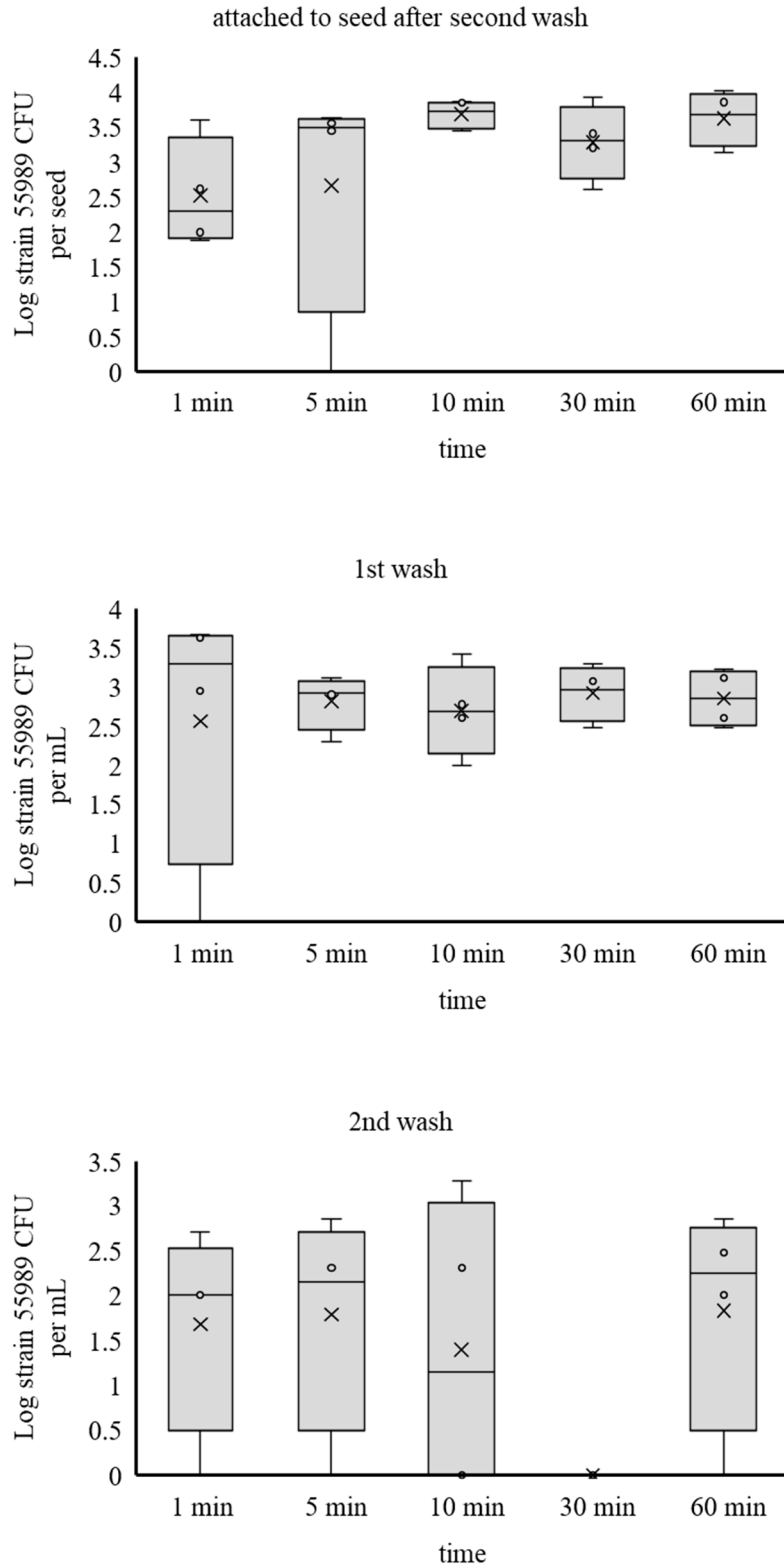

**Figure S1.** Recovery of strain 55989 CFUs from washed pea seeds (A) and from the first (B) and second (C) wash solutions. Seeds were submerged for different time periods in a strain 55989 cell suspension.

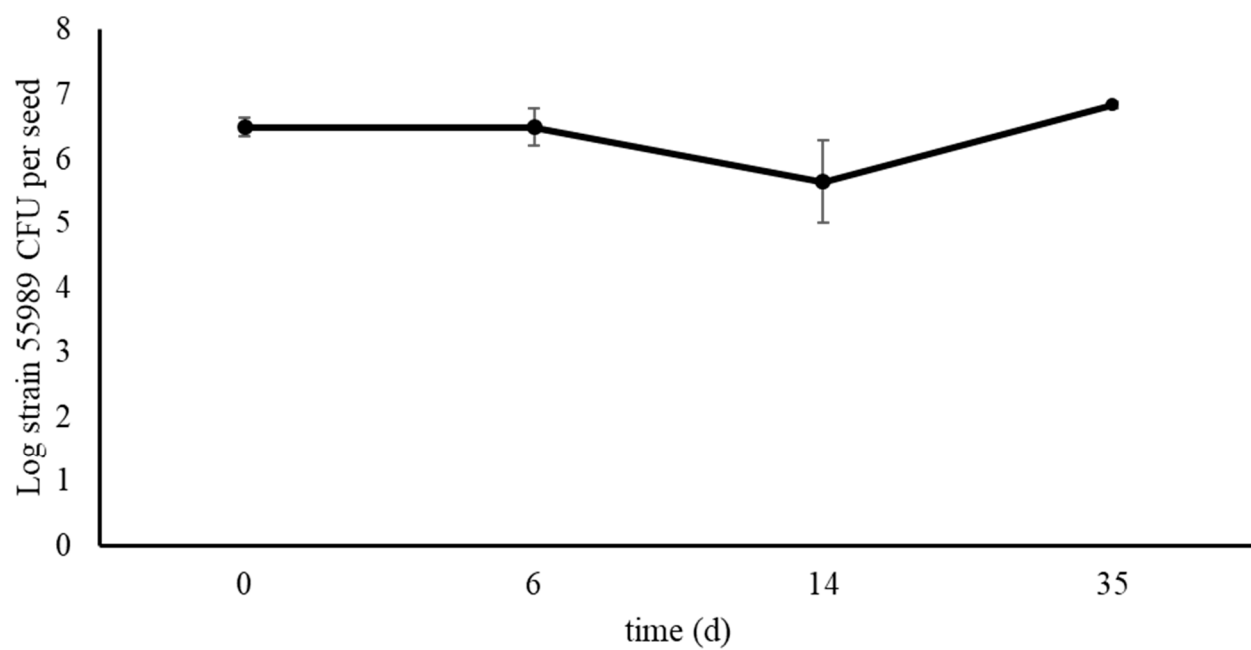

**Figure S2.** Persistence of strain 55989 cells on pea seeds. Seeds were submerged in a strain 55989 cell suspension, washed, dried and stored for 35 d at 4°C.
